# Supplementary material for: Systematic review and meta-analysis of prolactin and iron deficiency in peripartum cardiomyopathy
Source: HighWire-hosted journal article supplement (doi:10.1136/openhrt-2020-001430), 2020-10-01
Supplement: openhrt-2020-001430supp001_data_supplement.pdf [file openhrt-2020-001430supp001_data_supplement.pdf]

## Appendix 1. Search strategy for Medline (Ovid) 1946 to present

|    |                                                                                                                                                                                                                                                                                                                                                                                                         |
|----|---------------------------------------------------------------------------------------------------------------------------------------------------------------------------------------------------------------------------------------------------------------------------------------------------------------------------------------------------------------------------------------------------------|
| 1  | *Peripartum Period/ or *Pregnant women/ or Pregnancy Complications, Cardiovascular/ or *Pregnancy Outcome/ or *pregnancy/                                                                                                                                                                                                                                                                               |
| 2  | exp animals/ not humans.sh.                                                                                                                                                                                                                                                                                                                                                                             |
| 3  | 1 not 2                                                                                                                                                                                                                                                                                                                                                                                                 |
| 4  | (pregnan* or labour or labor or peripartum or perinatal or prenatal or antenatal or matern* or mother* or "pregnant wom*" or "expect* mother*").ti.                                                                                                                                                                                                                                                     |
| 5  | heart failure/ or *cardiomyopathies/                                                                                                                                                                                                                                                                                                                                                                    |
| 6  | limit 5 to pregnancy                                                                                                                                                                                                                                                                                                                                                                                    |
| 7  | 6 not 2                                                                                                                                                                                                                                                                                                                                                                                                 |
| 8  | *heart diseases/ or *cardiovascular diseases/                                                                                                                                                                                                                                                                                                                                                           |
| 9  | limit 8 to pregnancy                                                                                                                                                                                                                                                                                                                                                                                    |
| 10 | 9 not 2                                                                                                                                                                                                                                                                                                                                                                                                 |
| 11 | ("heart failure*" or "congestive heart failure" or "chf" or "chronic heart failure" or "decompensated heart failure*" or "acute heart failure*" or "acute decompensat* heart failure*" or "peripartum cardiomyopath*" or "PPCM" or "cardiomyopath*" or "cardiac complication*" or "heart complication*" or "cardiac event" or "major cardiac event*" or "major adverse cardi* event*" or "MACE").ti,ab. |
| 12 | 10 and 11                                                                                                                                                                                                                                                                                                                                                                                               |
| 13 | 3 or 4                                                                                                                                                                                                                                                                                                                                                                                                  |
| 14 | 7 or 11 or 12                                                                                                                                                                                                                                                                                                                                                                                           |
| 15 | 13 and 14                                                                                                                                                                                                                                                                                                                                                                                               |
| 16 | 15 and (murine or rat or rats or mouse or mice or sheep).ti.                                                                                                                                                                                                                                                                                                                                            |
| 17 | 15 not 16                                                                                                                                                                                                                                                                                                                                                                                               |
| 18 | limit 17 to case reports                                                                                                                                                                                                                                                                                                                                                                                |
| 19 | 17 and ("report" or "case adj report").ti.                                                                                                                                                                                                                                                                                                                                                              |
| 20 | 18 or 19                                                                                                                                                                                                                                                                                                                                                                                                |
| 21 | 17 not 20                                                                                                                                                                                                                                                                                                                                                                                               |
| 22 | 21 and (fet\$ or foet* or neonat\$ or newborn* or chil* or infan* or pediatri* or paediatri* or offspring*).ti.                                                                                                                                                                                                                                                                                         |
| 23 | 21 and ((fet\$ or foet* or neonat\$ or newborn* or chil* or infan* or pediatri* or paediatri* or offspring*) adj1 (mother* or matern\$ or wom\$)).ti.                                                                                                                                                                                                                                                   |
| 24 | 22 not 23                                                                                                                                                                                                                                                                                                                                                                                               |
| 25 | 21 not 24                                                                                                                                                                                                                                                                                                                                                                                               |
| 26 | limit 25 to (comment or editorial or letter)                                                                                                                                                                                                                                                                                                                                                            |
| 27 | 25 and (author* adj1 reply).ti.                                                                                                                                                                                                                                                                                                                                                                         |
| 28 | 26 or 27                                                                                                                                                                                                                                                                                                                                                                                                |
| 29 | 25 not 28                                                                                                                                                                                                                                                                                                                                                                                               |
