# Supplementary material for: Systematic review and meta-analysis of prolactin and iron deficiency in peripartum cardiomyopathy
Source: HighWire-hosted journal article supplement (doi:10.1136/openhrt-2020-001430), 2020-10-01
Supplement: openhrt-2020-001430supp002_data_supplement.pdf [file openhrt-2020-001430supp002_data_supplement.pdf]

## Appendix 2. Data extraction tool

**General Information**

|                                            |  |
|--------------------------------------------|--|
| <b>Date form completed</b> (dd/mm/yyyy)    |  |
| <b>Initial of reviewer extracting data</b> |  |
| <b>Reference citation</b> (APA style)      |  |
| <b>Notes:</b>                              |  |

**Study Eligibility**

|                                                            | <b>Eligibility criteria</b>                                                                                                                                                                                                                                                                                             | <b>Eligibility Criteria met?</b><br>(Y/N/Unclear) | <b>Location In text</b> |
|------------------------------------------------------------|-------------------------------------------------------------------------------------------------------------------------------------------------------------------------------------------------------------------------------------------------------------------------------------------------------------------------|---------------------------------------------------|-------------------------|
| <b>Study Type</b>                                          | Any analytical study with at least one comparator group                                                                                                                                                                                                                                                                 |                                                   |                         |
| <b>Study population</b>                                    | All pregnant women or postpartum women within 5 months of delivery                                                                                                                                                                                                                                                      |                                                   |                         |
| <b>Comparator group</b>                                    | Pregnant women or postpartum women within 5 months of delivery with no pre-existing cardiovascular diseases AND without heart failure/PPCM;<br><br>OR<br><br>Pregnant women or postpartum women within 5 months of delivery with no pre-existing cardiovascular diseases AND not exposed to the Risk Factor of interest |                                                   |                         |
| <b>Disease/Outcome of Interest</b>                         | Peripartum Cardiomyopathy                                                                                                                                                                                                                                                                                               |                                                   |                         |
| <b>Outcome measures reported</b>                           | Levels and/or presence of molecular biomarkers                                                                                                                                                                                                                                                                          |                                                   |                         |
| <b>Eligibility Decision</b><br>(with reason for exclusion) |                                                                                                                                                                                                                                                                                                                         |                                                   |                         |
| <b>Notes:</b>                                              |                                                                                                                                                                                                                                                                                                                         |                                                   |                         |

DO NOT PROCEED IF STUDY IS EXCLUDED FROM REVIEW

**Methods**

|                             | Description | Location in text |
|-----------------------------|-------------|------------------|
| <b>Aim of the study</b>     |             |                  |
| <b>Main outcome(s)</b>      |             |                  |
| <b>Secondary outcome(s)</b> |             |                  |
| <b>Study Design</b>         |             |                  |
| <b>Sampling Method</b>      |             |                  |
| <b>Study period:</b>        |             |                  |
| Notes:                      |             |                  |

**Population and Setting**

|                                                                           | Description | Location in text |
|---------------------------------------------------------------------------|-------------|------------------|
| <b>Population description</b>                                             |             |                  |
| <b>Cases description</b>                                                  |             |                  |
| <b>Comparator group description</b>                                       |             |                  |
| <b>Country of origin</b>                                                  |             |                  |
| <b>Source/setting of the population</b>                                   |             |                  |
| <b>Sample size</b>                                                        |             |                  |
| <b>Number of cases</b>                                                    |             |                  |
| <b>Definition of PPCM used:</b>                                           |             |                  |
| <b>Method of PPCM Diagnosis:</b>                                          |             |                  |
| <b>Exclusion criteria</b>                                                 |             |                  |
| <b>Gestation stage of cases at enrolment</b>                              |             |                  |
| <b>Any treatment provided? (if yes, specify)</b>                          |             |                  |
| <b>Clusters (if applicable: # of clusters, type, # of people/cluster)</b> |             |                  |
| <b>Withdrawals and exclusions</b>                                         |             |                  |
| Notes:                                                                    |             |                  |

**Variables Measured**

|                                                                                             |  |  |
|---------------------------------------------------------------------------------------------|--|--|
| <b>Demographic variable(s) measured</b>                                                     |  |  |
| <b>Co-morbidities measured</b>                                                              |  |  |
| <b>Risk factor(s)/Predictor(s) of HF or PCCM measured (must have OR, RR or HR reported)</b> |  |  |
| <b>Laboratory biomarker(s) measured</b>                                                     |  |  |
| Notes:                                                                                      |  |  |

### Biomarker measurements

| Biomarker 1                                                                                   | Description | Location in text |
|-----------------------------------------------------------------------------------------------|-------------|------------------|
| <b>Name</b>                                                                                   |             |                  |
| <b>Nature of the biomarker:</b> E.g. hormone, antibody, enzyme, cytokine, ionic compound etc. |             |                  |
| <b>What is the biomarker measuring?</b>                                                       |             |                  |
| <b>Source:</b> urine, blood (specify if plasma, serum, RBC etc.), saliva, etc.                |             |                  |
| <b>Method of detection:</b> ELISA, cytometry, western blot etc.                               |             |                  |
| <b>Unit of measurement</b>                                                                    |             |                  |
| <b>Time point measured</b>                                                                    |             |                  |
| Notes:                                                                                        |             |                  |

### Results and findings

| Biomarker 1                                                       | Description | Location in text |
|-------------------------------------------------------------------|-------------|------------------|
| <b>Name</b>                                                       |             |                  |
| <b>Measurement reported:</b> mean, median, change in mean/median  |             |                  |
| <b>Value of the measurement reported (Cases)</b>                  |             |                  |
| <b>Value of the measurement reported (Controls)</b>               |             |                  |
| <b>Overall Significance (95% CI and/or p-values)</b>              |             |                  |
| <b>Value of the measurement reported (clusters) if applicable</b> |             |                  |
| <b>Clusters Significance (95% CI and/or p-values)</b>             |             |                  |
| <b>Key conclusions of study authors</b>                           |             |                  |
| Notes:                                                            |             |                  |
