# Supplementary material for: Systematic review and meta-analysis of prolactin and iron deficiency in peripartum cardiomyopathy
Source: HighWire-hosted journal article supplement (doi:10.1136/openhrt-2020-001430), 2020-10-01
Supplement: openhrt-2020-001430supp003_data_supplement.pdf [file openhrt-2020-001430supp003_data_supplement.pdf]

## Appendix 3. Quality assessment tool for case-control studies\*

\*Modified from the Study Assessment Tool of the National Heart, Lung and Blood Institute<sup>13</sup>**General Information**

|                                                   |  |
|---------------------------------------------------|--|
| <b>Date form completed</b> (dd/mm/yyyy)           |  |
| <b>Initial of reviewer completing the Q&amp;A</b> |  |
| <b>Reference citation</b>                         |  |

**Summary of risk of bias**

| <b>Risk of bias Domain</b>           | <b>Definition</b>                                                                                                                                      | <b>Yes/No</b> |
|--------------------------------------|--------------------------------------------------------------------------------------------------------------------------------------------------------|---------------|
| Research question & study population | Can we be confident that the researchers had a well-defined study goal and population?                                                                 |               |
| Control group selection              | Can we be confident that the control group is a representative sample of the general population?                                                       |               |
| Case definition                      | Can we be confident that the case definition did not lead to misclassification on the target condition?                                                |               |
| Assessment of exposure               | Can we be confident in the conduct and/or interpretation of the biomarker results?                                                                     |               |
| Confounding                          | Can we be confident that the authors accounted for other relevant factors that could potentially explain the association between exposure and outcome. |               |

Overall quality Rating (Poor/Fair/Good): \_\_\_\_\_

| Criteria                                                                                                                                                                                                      | Yes/No/NA/Unclear (cd, nr) | Text location |
|---------------------------------------------------------------------------------------------------------------------------------------------------------------------------------------------------------------|----------------------------|---------------|
| Domain 1: Research question & study population                                                                                                                                                                |                            |               |
| 1. Was the research question or objective in this paper clearly stated and appropriate?                                                                                                                       |                            |               |
| 2. Was the study population clearly specified and defined?                                                                                                                                                    |                            |               |
| 3. Did the authors include a sample size justification?                                                                                                                                                       |                            |               |
| Domain 1 Notes:                                                                                                                                                                                               |                            |               |
| Domain 2: Control group selection                                                                                                                                                                             |                            |               |
| 4. Were controls selected or recruited from the same or similar population that gave rise to the cases (including the same timeframe)?                                                                        |                            |               |
| 5. If less than 100 percent of eligible cases and/or controls were selected for the study, were the cases and/or controls randomly selected from those eligible?                                              |                            |               |
| 6. Was there use of concurrent controls?                                                                                                                                                                      |                            |               |
| Domain 2 Notes:                                                                                                                                                                                               |                            |               |
| Domain 3: Case definition                                                                                                                                                                                     |                            |               |
| 7. Were the definitions, inclusion and exclusion criteria, algorithms or processes used to identify or select cases and controls valid, reliable, and implemented consistently across all study participants? |                            |               |
| 8. Were the cases clearly defined and differentiated from controls?                                                                                                                                           |                            |               |
| Domain 3 Notes:                                                                                                                                                                                               |                            |               |
| Domain 4: Assessment of exposure/biomarker(s)                                                                                                                                                                 |                            |               |

|                                                                                                                                                                                           |  |  |
|-------------------------------------------------------------------------------------------------------------------------------------------------------------------------------------------|--|--|
| 9. Where possible, were the investigators able to confirm that the biomarker exposure occurred prior to the development of the condition or event that defined a participant as a case?   |  |  |
| 10a. Were the biomarker measurements clearly defined?                                                                                                                                     |  |  |
| 10b. Were biomarker measurements valid?                                                                                                                                                   |  |  |
| 10c. Were biomarker measurements reliable?                                                                                                                                                |  |  |
| 10d. Were the biomarker measurements implemented consistently across all study participants? (including the same time period)                                                             |  |  |
| 11. Were the assessors of exposure blinded to the case or control status of participants?                                                                                                 |  |  |
| Domain 4 Notes:                                                                                                                                                                           |  |  |
| Domain 5: Confounding                                                                                                                                                                     |  |  |
| 12. Were key potential confounding variables measured and adjusted statistically in the analyses? If matching was used, did the investigators account for matching during study analysis? |  |  |
| Domain 5 Notes:                                                                                                                                                                           |  |  |
